# Supplementary material for: Sample size determination for bibliographic retrieval studies
Source: Springer Nature journal article supplement (doi:10.1186/1472-6947-8-43), 2008-09-29
Supplement: Additional file 3 [file 1472-6947-8-43-s3.pdf]

**Additional file 3 - Probabilities for subsets of any numbers of randomly sampled journals with  $\geq 99$  pass articles**

| <b>Journal subsets</b> | <b>Average probability (%)</b> | <b>SE* of probability (%)</b> |
|------------------------|--------------------------------|-------------------------------|
| 1                      | 0                              | 0                             |
| 2                      | 1.01                           | 0.01                          |
| 3                      | 3.67                           | 0.02                          |
| 4                      | 8.06                           | 0.02                          |
| 5                      | 14.98                          | 0.03                          |
| 6                      | 23.26                          | 0.04                          |
| 7                      | 32.87                          | 0.04                          |
| 8                      | 43.23                          | 0.04                          |
| 9                      | 53.64                          | 0.04                          |
| 10                     | 63.56                          | 0.043                         |
| 11                     | 72.32                          | 0.04                          |
| 12                     | 79.89                          | 0.04                          |
| 13                     | 85.95                          | 0.03                          |
| 14                     | 90.51                          | 0.03                          |
| 15                     | 94.04                          | 0.02                          |
| 16                     | 96.29                          | 0.02                          |
| 17                     | 97.74                          | 0.01                          |
| 18                     | 98.66                          | 0.01                          |
| 19                     | 99.22                          | 0.01                          |
| 20                     | 99.63                          | 0.01                          |
| 21                     | 99.82                          | 0.00                          |
| 22                     | 99.90                          | 0.00                          |
| 23                     | 99.95                          | 0.00                          |
| 24                     | 99.98                          | 0.00                          |
| 25                     | 99.99                          | 0.00                          |
| 26                     | 100.00                         | 0.00                          |
| 27                     | 100.00                         | 0.00                          |

\*SE = standard error.
